# Supplementary material
Source: PubMed Central journal article supplement (PMC8511166)
Supplement: mmc1.pdf [file mmc1.pdf]

**Biophysical Journal, Volume 120**

**Supplemental information**

**Multiscale computational study of ligand binding pathways: Case of  
p38 MAP kinase and its inhibitors**

**Yu-ming M. Huang**

| No. | DFG conf. | inhibitor | # of inhibitor diffused | threshold energy | adaptive GaMD | simulation length (ns) | com-RMSD (Å) | ha-RMSD (Å) |
|-----|-----------|-----------|-------------------------|------------------|---------------|------------------------|--------------|-------------|
| 1   | in        | SB2       | 1                       | lower            | no            | 2000                   | >10          | >10         |
| 2   | in        | SB2       | 1                       | lower            | no            | 1947                   | >10          | >10         |
| 3   | in        | SB2       | 1                       | lower            | no            | 1918                   | >10          | >10         |
| 4   | in        | SB2       | 1                       | lower            | no            | 1748                   | >10          | >10         |
| 5   | in        | SB2       | 1                       | lower            | no            | 1888                   | >10          | >10         |
| 6   | in        | SB2       | 1                       | lower            | no            | 1977                   | >10          | >10         |
| 7   | in        | SB2       | 1                       | lower            | no            | 1946                   | >10          | >10         |
| 8   | in        | SB2       | 1                       | lower            | no            | 1892                   | >10          | >10         |
| 9   | in        | SB2       | 1                       | lower            | no            | 1999                   | >10          | >10         |
| 10  | in        | SB2       | 1                       | lower            | no            | 1985                   | >10          | >10         |
| 11  | in        | SB2       | 8                       | lower            | no            | 1931                   | >10          | >10         |
| 12  | in        | SB2       | 8                       | lower            | no            | 1927                   | >10          | >10         |
| 13  | in        | SB2       | 8                       | lower            | no            | 1927                   | >10          | >10         |
| 14  | in        | SB2       | 8                       | lower            | no            | 1865                   | >10          | >10         |
| 15  | in        | SB2       | 8                       | lower            | no            | 1810                   | >10          | >10         |
| 16  | in        | SB2       | 8                       | lower            | no            | 1864                   | >10          | >10         |
| 17  | in        | SB2       | 8                       | lower            | no            | 1906                   | >10          | >10         |
| 18  | in        | SB2       | 8                       | lower            | no            | 1853                   | >10          | >10         |
| 19  | in        | SB2       | 8                       | lower            | no            | 1759                   | >10          | >10         |
| 20  | in        | SB2       | 8                       | lower            | no            | 1947                   | >10          | >10         |
| 21  | in        | SB2       | 1                       | lower            | yes           | 500                    | >10          | >10         |
| 22  | in        | SB2       | 1                       | lower            | yes           | 500                    | >10          | >10         |
| 23  | in        | SB2       | 1                       | lower            | yes           | 500                    | >10          | >10         |
| 24  | in        | SB2       | 1                       | lower            | yes           | 500                    | >10          | >10         |
| 25  | in        | SB2       | 1                       | lower            | yes           | 500                    | >10          | >10         |
| 26  | in        | SB2       | 1                       | lower            | yes           | 400                    | >10          | >10         |
| 27  | in        | SB2       | 1                       | lower            | yes           | 373                    | >10          | >10         |
| 28  | in        | SB2       | 1                       | lower            | yes           | 400                    | >10          | >10         |
| 29  | in        | SB2       | 1                       | lower            | yes           | 400                    | >10          | >10         |
| 30  | in        | SB2       | 1                       | upper            | yes           | 500                    | >10          | >10         |
| 31  | in        | SB2       | 1                       | upper            | yes           | 500                    | 0.144        | 1.655       |
| 32  | in        | SB2       | 1                       | upper            | yes           | 500                    | 3.149        | 6.449       |
| 33  | in        | SB2       | 1                       | upper            | yes           | 500                    | >10          | >10         |
| 34  | in        | SB2       | 1                       | upper            | yes           | 500                    | >10          | >10         |
| 35  | in        | SB2       | 1                       | upper            | yes           | 500                    | >10          | >10         |
| 36  | in        | SB2       | 1                       | upper            | yes           | 500                    | >10          | >10         |
| 37  | in        | SB2       | 1                       | upper            | yes           | 1400                   | 0.126        | 1.236       |
| 38  | in        | SB2       | 1                       | upper            | yes           | 1400                   | 0.364        | 1.614       |
| 39  | in        | SB2       | 1                       | upper            | yes           | 500                    | >10          | >10         |
| 40  | in        | SB2       | 1                       | upper            | yes           | 1410                   | 1.770        | 5.376       |
| 41  | in        | SB2       | 1                       | upper            | yes           | 500                    | >10          | >10         |
| 42  | in        | SB2       | 1                       | upper            | yes           | 500                    | >10          | >10         |

|    |    |     |   |       |     |       |       |       |
|----|----|-----|---|-------|-----|-------|-------|-------|
| 43 | in | SB2 | 1 | upper | yes | 300   | >10   | >10   |
| 44 | in | SB2 | 1 | upper | yes | 500   | >10   | >10   |
| 45 | in | SB2 | 8 | upper | yes | 500   | >10   | >10   |
| 46 | in | SB2 | 8 | upper | yes | 500   | >10   | >10   |
| 47 | in | SB2 | 8 | upper | yes | 500   | 1.809 | 2.330 |
| 48 | in | SB2 | 8 | upper | yes | 500   | >10   | >10   |
| 49 | in | SB2 | 8 | upper | yes | 500   | >10   | >10   |
| 50 | in | SB2 | 8 | upper | yes | 500   | >10   | >10   |
| 51 | in | SB2 | 8 | upper | yes | 700   | 1.784 | 4.308 |
| 52 | in | SB2 | 8 | upper | yes | 1468  | 0.367 | 1.553 |
| 53 | in | SB2 | 8 | upper | yes | 612   | >10   | >10   |
| 54 | in | SB2 | 8 | upper | yes | 707   | >10   | >10   |
| 55 | in | SK8 | 1 | lower | yes | 500   | >10   | >10   |
| 56 | in | SK8 | 1 | lower | yes | 500   | >10   | >10   |
| 57 | in | SK8 | 1 | lower | yes | 500   | >10   | >10   |
| 58 | in | SK8 | 1 | lower | yes | 500   | >10   | >10   |
| 59 | in | SK8 | 1 | lower | yes | 500   | >10   | >10   |
| 60 | in | SK8 | 8 | lower | no  | 1901  | >10   | >10   |
| 61 | in | SK8 | 8 | lower | no  | 1920  | >10   | >10   |
| 62 | in | SK8 | 8 | lower | no  | 1863  | >10   | >10   |
| 63 | in | SK8 | 8 | lower | no  | 1748  | 0.013 | 0.386 |
| 64 | in | SK8 | 8 | lower | no  | 2000  | >10   | >10   |
| 65 | in | SK8 | 8 | lower | no  | 2000  | >10   | >10   |
| 66 | in | SK8 | 8 | lower | no  | 1900  | >10   | >10   |
| 67 | in | SK8 | 8 | lower | no  | 1954  | 3.437 | 5.474 |
| 68 | in | SK8 | 8 | lower | no  | 18078 | >10   | >10   |
| 69 | in | SK8 | 8 | lower | no  | 1902  | >10   | >10   |
| 70 | in | SK8 | 1 | upper | yes | 400   | >10   | >10   |
| 71 | in | SK8 | 1 | upper | yes | 500   | >10   | >10   |
| 72 | in | SK8 | 1 | upper | yes | 500   | >10   | >10   |
| 73 | in | SK8 | 1 | upper | yes | 500   | >10   | >10   |
| 74 | in | SK8 | 1 | upper | yes | 500   | >10   | >10   |
| 75 | in | SK8 | 1 | upper | yes | 500   | >10   | >10   |
| 76 | in | SK8 | 1 | upper | yes | 500   | >10   | >10   |
| 77 | in | SK8 | 1 | upper | yes | 500   | >10   | >10   |
| 78 | in | SK8 | 1 | upper | yes | 500   | >10   | >10   |
| 79 | in | SK8 | 1 | upper | yes | 500   | >10   | >10   |
| 80 | in | SK8 | 1 | upper | yes | 500   | >10   | >10   |
| 81 | in | SK8 | 1 | upper | yes | 500   | >10   | >10   |
| 82 | in | SK8 | 1 | upper | yes | 500   | >10   | >10   |
| 83 | in | SK8 | 1 | upper | yes | 900   | >10   | >10   |
| 84 | in | SK8 | 1 | upper | yes | 500   | >10   | >10   |
| 85 | in | SK8 | 8 | upper | yes | 400   | >10   | >10   |
| 86 | in | SK8 | 8 | upper | yes | 500   | >10   | >10   |
| 87 | in | SK8 | 8 | upper | yes | 900   | 0.015 | 0.318 |

|     |     |     |   |       |     |      |       |       |
|-----|-----|-----|---|-------|-----|------|-------|-------|
| 88  | in  | SK8 | 8 | upper | yes | 500  | >10   | >10   |
| 89  | in  | SK8 | 8 | upper | yes | 500  | >10   | >10   |
| 90  | in  | SK8 | 8 | upper | yes | 900  | 0.089 | 1.131 |
| 91  | in  | SK8 | 8 | upper | yes | 807  | >10   | >10   |
| 92  | in  | SK8 | 8 | upper | yes | 856  | 0.074 | 1.137 |
| 93  | in  | SK8 | 8 | upper | yes | 900  | 0.016 | 0.345 |
| 94  | in  | SK8 | 8 | upper | yes | 404  | >10   | >10   |
| 95  | in  | PUA | 1 | lower | yes | 500  | >10   | >10   |
| 96  | in  | PUA | 1 | lower | yes | 500  | >10   | >10   |
| 97  | in  | PUA | 1 | lower | yes | 500  | >10   | >10   |
| 98  | in  | PUA | 1 | lower | yes | 500  | >10   | >10   |
| 99  | in  | PUA | 1 | lower | yes | 500  | >10   | >10   |
| 100 | in  | PUA | 1 | upper | yes | 500  | >10   | >10   |
| 101 | in  | PUA | 1 | upper | yes | 500  | >10   | >10   |
| 102 | in  | PUA | 1 | upper | yes | 500  | >10   | >10   |
| 103 | in  | PUA | 1 | upper | yes | 500  | >10   | >10   |
| 104 | in  | PUA | 1 | upper | yes | 500  | >10   | >10   |
| 105 | in  | PUA | 8 | upper | yes | 500  | >10   | >10   |
| 106 | in  | PUA | 8 | upper | yes | 500  | >10   | >10   |
| 107 | in  | PUA | 8 | upper | yes | 500  | >10   | >10   |
| 108 | in  | PUA | 8 | upper | yes | 500  | >10   | >10   |
| 109 | in  | PUA | 8 | upper | yes | 500  | >10   | >10   |
| 110 | out | SB2 | 1 | lower | yes | 500  | >10   | >10   |
| 111 | out | SB2 | 1 | lower | yes | 500  | >10   | >10   |
| 112 | out | SB2 | 1 | lower | yes | 500  | >10   | >10   |
| 113 | out | SB2 | 1 | lower | yes | 500  | >10   | >10   |
| 114 | out | SB2 | 1 | lower | yes | 500  | >10   | >10   |
| 115 | out | SB2 | 8 | lower | no  | 1334 | >10   | >10   |
| 116 | out | SB2 | 8 | lower | no  | 1887 | >10   | >10   |
| 117 | out | SB2 | 8 | lower | no  | 1910 | >10   | >10   |
| 118 | out | SB2 | 8 | lower | no  | 1859 | >10   | >10   |
| 119 | out | SB2 | 8 | lower | no  | 1996 | >10   | >10   |
| 120 | out | SB2 | 8 | lower | no  | 1826 | >10   | >10   |
| 121 | out | SB2 | 8 | lower | no  | 1685 | >10   | >10   |
| 122 | out | SB2 | 8 | lower | no  | 1855 | >10   | >10   |
| 123 | out | SB2 | 8 | lower | no  | 1954 | >10   | >10   |
| 124 | out | SB2 | 8 | lower | no  | 2000 | >10   | >10   |
| 125 | out | SB2 | 1 | upper | yes | 500  | >10   | >10   |
| 126 | out | SB2 | 1 | upper | yes | 500  | >10   | >10   |
| 127 | out | SB2 | 1 | upper | yes | 426  | >10   | >10   |
| 128 | out | SB2 | 1 | upper | yes | 500  | >10   | >10   |
| 129 | out | SB2 | 1 | upper | yes | 3000 | >10   | >10   |
| 130 | out | SB2 | 1 | upper | yes | 500  | >10   | >10   |
| 131 | out | SB2 | 1 | upper | yes | 416  | >10   | >10   |
| 132 | out | SB2 | 1 | upper | yes | 500  | >10   | >10   |

|     |     |     |   |       |     |      |       |       |
|-----|-----|-----|---|-------|-----|------|-------|-------|
| 133 | out | SB2 | 1 | upper | yes | 856  | >10   | >10   |
| 134 | out | SB2 | 1 | upper | yes | 500  | >10   | >10   |
| 135 | out | SB2 | 1 | upper | yes | 2000 | >10   | >10   |
| 136 | out | SB2 | 1 | upper | yes | 2000 | >10   | >10   |
| 137 | out | SB2 | 1 | upper | yes | 2000 | >10   | >10   |
| 138 | out | SB2 | 1 | upper | yes | 1200 | 0.008 | 1.131 |
| 139 | out | SB2 | 1 | upper | yes | 2000 | >10   | >10   |
| 140 | out | SB2 | 1 | upper | yes | 2000 | >10   | >10   |
| 141 | out | SB2 | 1 | upper | yes | 2000 | >10   | >10   |
| 142 | out | SB2 | 1 | upper | yes | 2000 | >10   | >10   |
| 143 | out | SB2 | 1 | upper | yes | 2000 | >10   | >10   |
| 144 | out | SB2 | 1 | upper | yes | 2000 | >10   | >10   |
| 145 | out | SB2 | 8 | upper | yes | 500  | 1.079 | 6.109 |
| 146 | out | SB2 | 8 | upper | yes | 500  | >10   | >10   |
| 147 | out | SB2 | 8 | upper | yes | 500  | 0.952 | 3.712 |
| 148 | out | SB2 | 8 | upper | yes | 500  | >10   | >10   |
| 149 | out | SB2 | 8 | upper | yes | 500  | >10   | >10   |
| 150 | out | SB2 | 8 | upper | yes | 500  | >10   | >10   |
| 151 | out | SB2 | 8 | upper | yes | 1929 | 2.417 | 4.791 |
| 152 | out | SB2 | 8 | upper | yes | 500  | >10   | >10   |
| 153 | out | SB2 | 8 | upper | yes | 500  | >10   | >10   |
| 154 | out | SB2 | 8 | upper | yes | 2000 | 1.202 | 1.842 |
| 155 | out | SB2 | 8 | upper | yes | 1500 | 0.008 | 0.748 |
| 156 | out | SB2 | 8 | upper | yes | 1500 | 0.008 | 0.822 |
| 157 | out | SB2 | 8 | upper | yes | 4000 | >10   | >10   |
| 158 | out | SB2 | 8 | upper | yes | 1500 | 0.095 | 0.777 |
| 159 | out | SB2 | 8 | upper | yes | 2000 | >10   | >10   |
| 160 | out | SB2 | 8 | upper | yes | 2000 | >10   | >10   |
| 161 | out | SB2 | 8 | upper | yes | 1400 | 0.007 | 0.577 |
| 162 | out | SB2 | 8 | upper | yes | 1400 | 0.021 | 1.127 |
| 163 | out | SB2 | 8 | upper | yes | 2000 | >10   | >10   |
| 164 | out | SB2 | 8 | upper | yes | 1300 | 0.004 | 1.228 |
| 165 | out | SK8 | 1 | lower | yes | 900  | >10   | >10   |
| 166 | out | SK8 | 1 | lower | yes | 900  | >10   | >10   |
| 167 | out | SK8 | 1 | lower | yes | 500  | >10   | >10   |
| 168 | out | SK8 | 1 | lower | yes | 500  | >10   | >10   |
| 169 | out | SK8 | 1 | lower | yes | 900  | >10   | >10   |
| 170 | out | SK8 | 1 | upper | yes | 500  | >10   | >10   |
| 171 | out | SK8 | 1 | upper | yes | 500  | >10   | >10   |
| 172 | out | SK8 | 1 | upper | yes | 500  | >10   | >10   |
| 173 | out | SK8 | 1 | upper | yes | 500  | >10   | >10   |
| 174 | out | SK8 | 1 | upper | yes | 500  | >10   | >10   |
| 175 | out | SK8 | 8 | upper | yes | 500  | >10   | >10   |
| 176 | out | SK8 | 8 | upper | yes | 500  | >10   | >10   |
| 177 | out | SK8 | 8 | upper | yes | 500  | >10   | >10   |

|     |     |     |   |       |     |      |       |        |
|-----|-----|-----|---|-------|-----|------|-------|--------|
| 178 | out | SK8 | 8 | upper | yes | 500  | >10   | >10    |
| 179 | out | SK8 | 8 | upper | yes | 500  | >10   | >10    |
| 180 | out | DU  | 4 | lower | no  | 1907 | >10   | >10    |
| 181 | out | DU  | 4 | lower | no  | 1960 | >10   | >10    |
| 182 | out | DU  | 4 | lower | no  | 1931 | >10   | >10    |
| 183 | out | DU  | 4 | lower | no  | 2086 | 5.145 | 6.815  |
| 184 | out | DU  | 4 | lower | no  | 1975 | >10   | >10    |
| 185 | out | DU  | 4 | lower | no  | 1985 | >10   | >10    |
| 186 | out | DU  | 4 | lower | no  | 2000 | >10   | >10    |
| 187 | out | DU  | 4 | lower | no  | 1486 | >10   | >10    |
| 188 | out | DU  | 4 | lower | no  | 1903 | >10   | >10    |
| 189 | out | DU  | 4 | lower | no  | 1949 | >10   | >10    |
| 190 | out | DU  | 1 | upper | yes | 500  | >10   | >10    |
| 191 | out | DU  | 1 | upper | yes | 500  | >10   | >10    |
| 192 | out | DU  | 1 | upper | yes | 1500 | >10   | >10    |
| 193 | out | DU  | 1 | upper | yes | 500  | >10   | >10    |
| 194 | out | DU  | 1 | upper | yes | 500  | >10   | >10    |
| 195 | out | DU  | 1 | upper | yes | 900  | >10   | >10    |
| 196 | out | DU  | 1 | upper | yes | 500  | >10   | >10    |
| 197 | out | DU  | 1 | upper | yes | 500  | >10   | >10    |
| 198 | out | DU  | 1 | upper | yes | 500  | >10   | >10    |
| 199 | out | DU  | 1 | upper | yes | 500  | >10   | >10    |
| 200 | out | DU  | 4 | upper | yes | 500  | >10   | >10    |
| 201 | out | DU  | 4 | upper | yes | 900  | >10   | >10    |
| 202 | out | DU  | 4 | upper | yes | 900  | >10   | >10    |
| 203 | out | DU  | 4 | upper | yes | 900  | >10   | >10    |
| 204 | out | DU  | 4 | upper | yes | 500  | >10   | >10    |
| 205 | out | DU  | 4 | upper | yes | 900  | >10   | >10    |
| 206 | out | DU  | 4 | upper | yes | 1953 | 4.159 | 6.468  |
| 207 | out | DU  | 4 | upper | yes | 500  | >10   | >10    |
| 208 | out | DU  | 4 | upper | yes | 500  | >10   | >10    |
| 209 | out | DU  | 4 | upper | yes | 500  | >10   | >10    |
| 210 | out | DU  | 4 | upper | yes | 2000 | >10   | >10    |
| 211 | out | DU  | 4 | upper | yes | 3000 | 0.008 | 1.039  |
| 212 | out | DU  | 4 | upper | yes | 1949 | 3.249 | 6.056  |
| 213 | out | DU  | 4 | upper | yes | 2000 | >10   | >10    |
| 214 | out | DU  | 4 | upper | yes | 2000 | >10   | >10    |
| 215 | out | DU  | 4 | upper | yes | 2000 | >10   | >10    |
| 216 | out | DU  | 4 | upper | yes | 1991 | 7.039 | 8.274  |
| 217 | out | DU  | 4 | upper | yes | 2000 | >10   | >10    |
| 218 | out | DU  | 4 | upper | yes | 1961 | 9.664 | 10.603 |
| 219 | out | DU  | 4 | upper | yes | 2000 | 3.910 | 6.601  |
| 220 | out | PUA | 1 | lower | no  | 2000 | >10   | >10    |
| 221 | out | PUA | 1 | lower | no  | 1902 | >10   | >10    |
| 222 | out | PUA | 1 | lower | no  | 1978 | >10   | >10    |

|     |     |     |   |       |     |       |       |       |
|-----|-----|-----|---|-------|-----|-------|-------|-------|
| 223 | out | PUA | 1 | lower | no  | 1902  | >10   | >10   |
| 224 | out | PUA | 1 | lower | no  | 1902  | >10   | >10   |
| 225 | out | PUA | 1 | lower | no  | 1600  | >10   | >10   |
| 226 | out | PUA | 1 | lower | no  | 1886  | >10   | >10   |
| 227 | out | PUA | 1 | lower | no  | 2000  | >10   | >10   |
| 228 | out | PUA | 1 | lower | no  | 2000  | >10   | >10   |
| 229 | out | PUA | 1 | lower | no  | 1838  | >10   | >10   |
| 230 | out | PUA | 1 | lower | yes | 500   | >10   | >10   |
| 231 | out | PUA | 1 | lower | yes | 500   | >10   | >10   |
| 232 | out | PUA | 1 | lower | yes | 500   | >10   | >10   |
| 233 | out | PUA | 1 | lower | yes | 500   | >10   | >10   |
| 234 | out | PUA | 1 | lower | yes | 500   | >10   | >10   |
| 235 | out | PUA | 1 | upper | yes | 500   | >10   | >10   |
| 236 | out | PUA | 1 | upper | yes | 500   | >10   | >10   |
| 237 | out | PUA | 1 | upper | yes | 500   | >10   | >10   |
| 238 | out | PUA | 1 | upper | yes | 500   | >10   | >10   |
| 239 | out | PUA | 1 | upper | yes | 800   | 2.815 | 5.730 |
| 240 | out | PUA | 1 | upper | yes | 13600 | 0.009 | 1.213 |
| 241 | out | PUA | 1 | upper | yes | 500   | >10   | >10   |
| 242 | out | PUA | 1 | upper | yes | 900   | >10   | >10   |
| 243 | out | PUA | 1 | upper | yes | 1455  | >10   | >10   |
| 244 | out | PUA | 1 | upper | yes | 500   | >10   | >10   |
| 245 | out | PUA | 1 | upper | yes | 500   | >10   | >10   |
| 246 | out | PUA | 1 | upper | yes | 333   | >10   | >10   |
| 247 | out | PUA | 1 | upper | yes | 425   | >10   | >10   |
| 248 | out | PUA | 1 | upper | yes | 1400  | >10   | >10   |
| 249 | out | PUA | 1 | upper | yes | 500   | >10   | >10   |
| 250 | out | PUA | 1 | upper | yes | 2000  | 3.553 | 6.947 |
| 251 | out | PUA | 1 | upper | yes | 2000  | >10   | >10   |
| 252 | out | PUA | 1 | upper | yes | 2000  | >10   | >10   |
| 253 | out | PUA | 1 | upper | yes | 2000  | >10   | >10   |
| 254 | out | PUA | 1 | upper | yes | 2000  | >10   | >10   |
| 255 | out | PUA | 1 | upper | yes | 2000  | >10   | >10   |
| 256 | out | PUA | 1 | upper | yes | 10900 | 1.117 | 5.389 |
| 257 | out | PUA | 1 | upper | yes | 2000  | >10   | >10   |
| 258 | out | PUA | 1 | upper | yes | 2000  | >10   | >10   |
| 259 | out | PUA | 1 | upper | yes | 2000  | >10   | >10   |
| 260 | out | PUA | 8 | upper | yes | 500   | >10   | >10   |
| 261 | out | PUA | 8 | upper | yes | 500   | >10   | >10   |
| 262 | out | PUA | 8 | upper | yes | 500   | >10   | >10   |
| 263 | out | PUA | 8 | upper | yes | 500   | >10   | >10   |
| 264 | out | PUA | 8 | upper | yes | 500   | >10   | >10   |
| 265 | out | PUA | 8 | upper | yes | 1964  | 4.065 | 6.437 |
| 266 | out | PUA | 8 | upper | yes | 1500  | >10   | >10   |
| 267 | out | PUA | 8 | upper | yes | 407   | >10   | >10   |

|     |     |     |   |       |     |      |     |     |
|-----|-----|-----|---|-------|-----|------|-----|-----|
| 268 | out | PUA | 8 | upper | yes | 1827 | >10 | >10 |
| 269 | out | PUA | 8 | upper | yes | 403  | >10 | >10 |

**Table S1: List of GaMD simulations.** Four inhibitors, SB2, SK8, DU, and PUA, were diffused to both DFG-in and DFG-out p38. We placed one, four, or eight inhibitors in a water box to obtain the inhibitor association pathways with a single protein. The threshold energy level was set to either lower or upper bound. The adaptive GaMD indicates that the boost potential was updated until the end of simulations, while the boost energy was only updated in the first 100 ns and remained at a certain number in the rest of simulations, namely non-adaptive GaMD. Also, we computed two types of RMSD values, com-RMSD and ha-RMSD. Red highlights the simulations that the inhibitors reached the active site with both low com-RMSD and ha-RMSD. Blue highlights the simulations showing low com-RMSD but high ha-RMSD, suggesting the inhibitors were located in the active site, yet the key protein-ligand interactions were not completely formed.



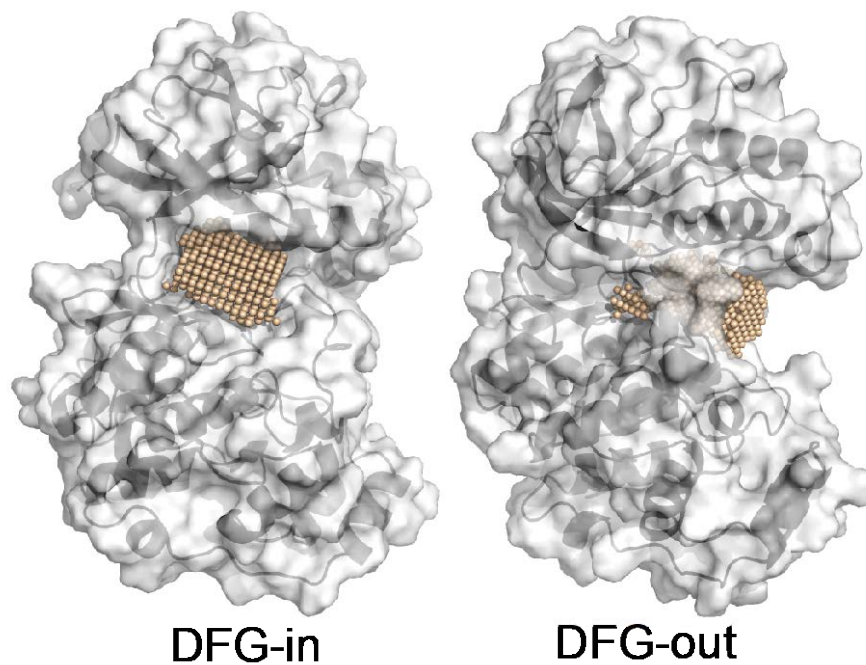

**Figure S1: Comparison of the binding channel of two apo p38 crystal structures.**

The beads filled in the channel were used to calculate the volume.

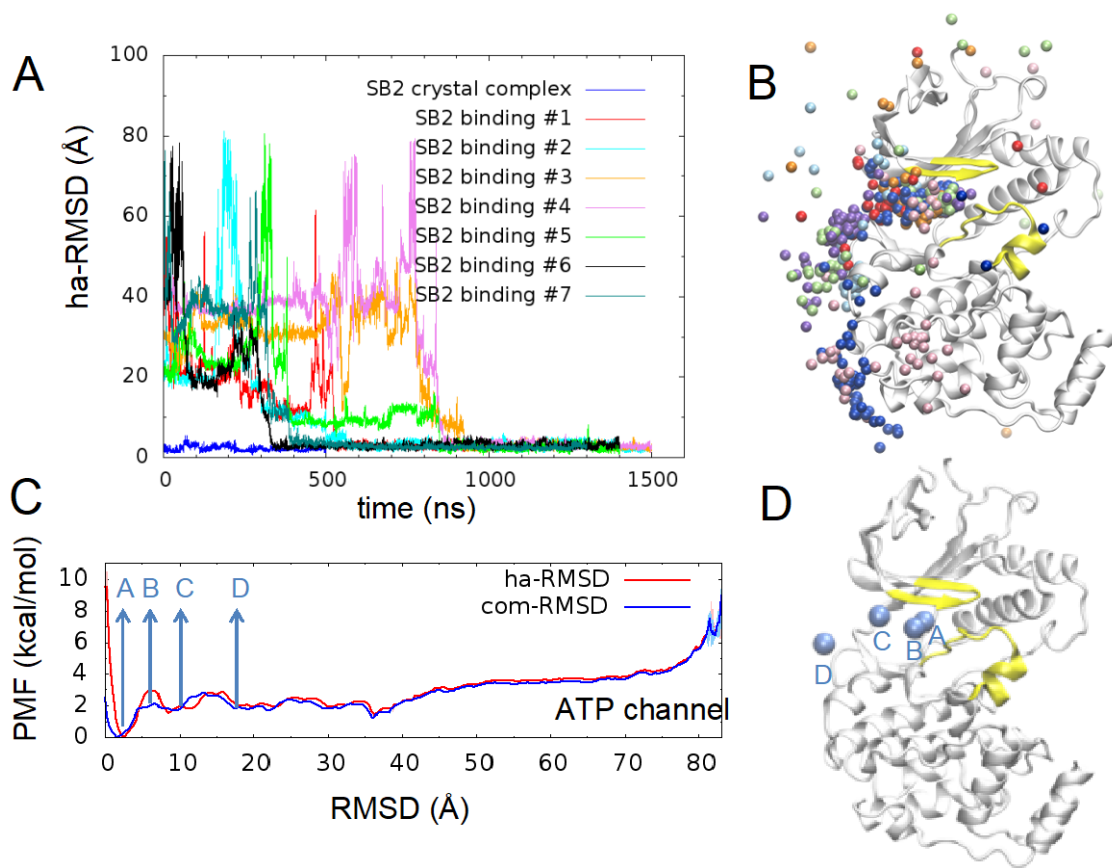

**Figure S2: Association of SB2 to DFG-out p38.** (A) com-RMSD and ha-RMSD plot of seven binding trajectories. (B) Association of the successful binding paths labeled by seven different colored beads. Yellow indicates the p38 Gly-rich and activation loop. (C) 1D PMF plot according to the ATP channel. The letters represent each low-energy state. (D) Blue beads indicate the SB2 positions at the low-energy states along the ATP channel.

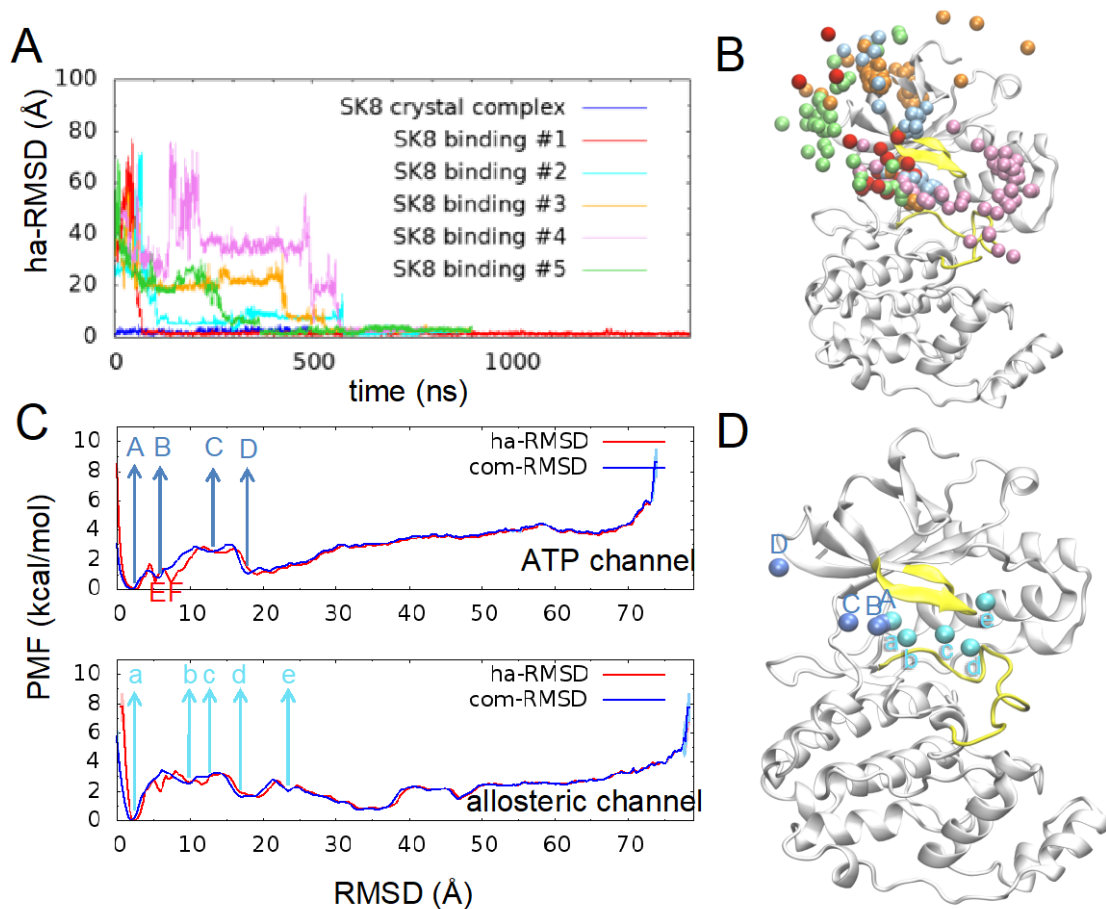

**Figure S3: Association of SK8 to DFG-in p38.** (A) com-RMSD and ha-RMSD plot of five binding trajectories. (B) Association of the successful binding paths labeled by five different colored beads. Yellow indicates the p38 Gly-rich and activation loop. (C) The 1D PMF plot along the ATP and allosteric channel. The letters label each low-energy state. (D) Blue and cyan beads indicate the SK8 positions at the low-energy states along the ATP and allosteric channel, respectively.

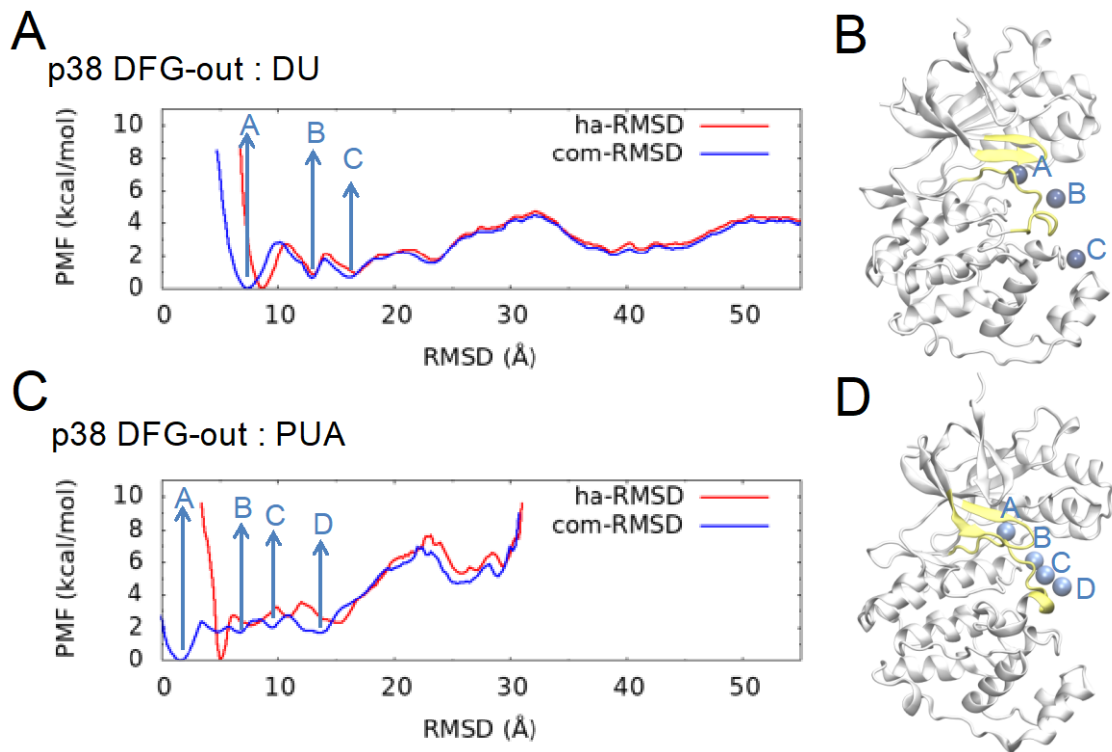

**Figure S4: Association of DU and PUA to DFG-in p38.** (A) com-RMSD and ha-RMSD plot of the DU binding trajectory. (B) Blue beads indicate the DU positions at the low-energy states along the allosteric channel. Yellow indicates the p38 Gly-rich and activation loop. (C) com-RMSD and ha-RMSD plot of the PUA binding trajectory. (D) Blue beads indicate the PUA positions at the low-energy states along the allosteric channel.

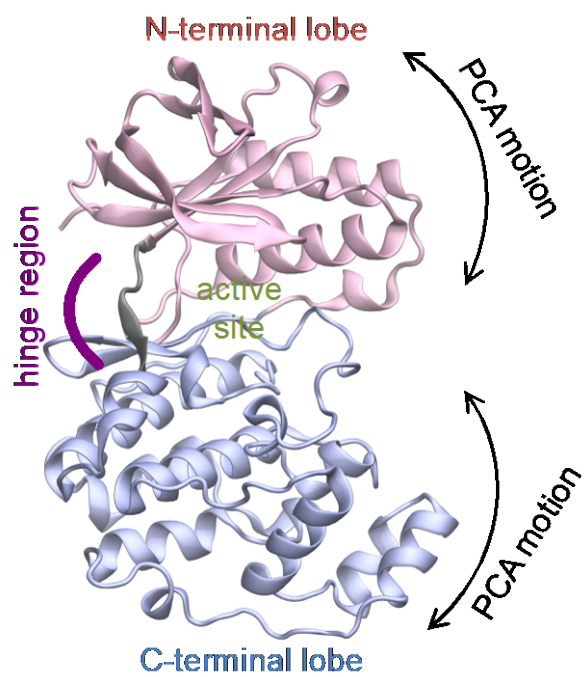

**Figure S5: The correlation motions of the apo p38 protein calculated by PCA.**

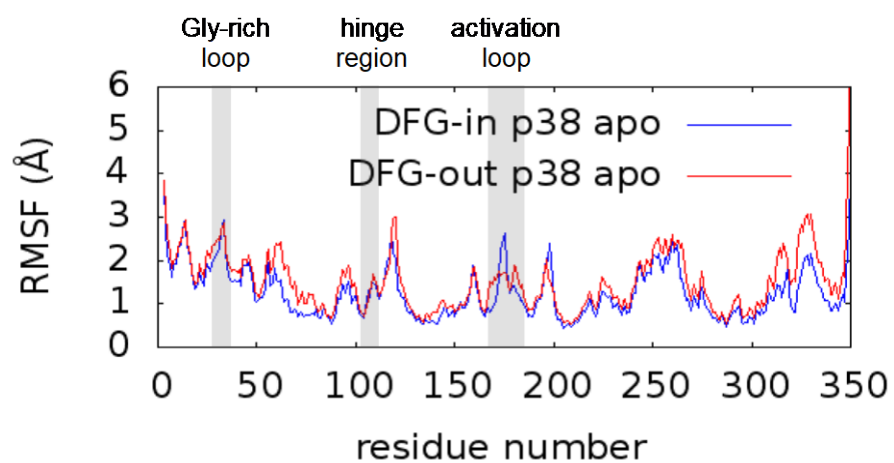

**Figure S6: The RMSF calculations of the apo p38 protein.**

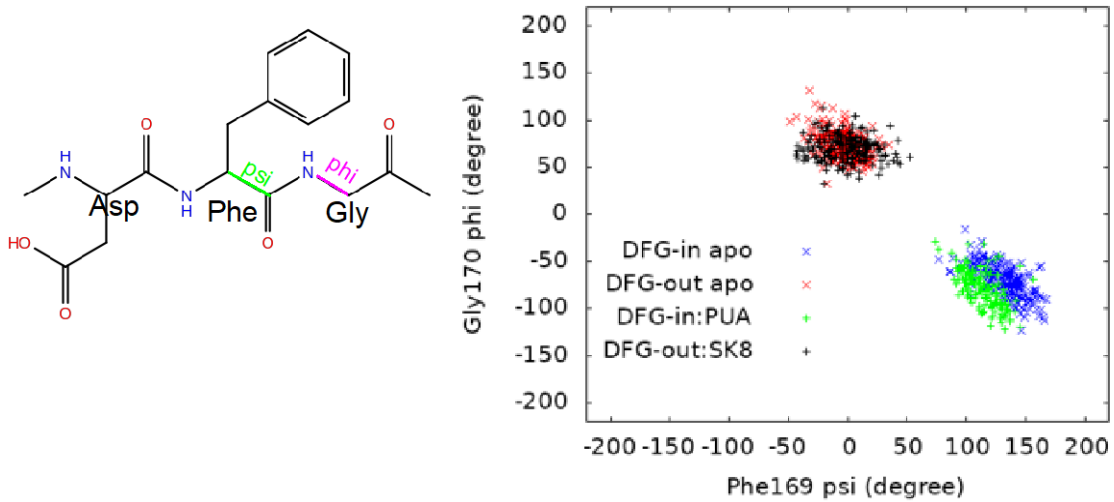

**Figure S7: The dihedral angles of DFG motifs.** We computed Phe169 psi angles and Gly170 phi angles using the trajectories of apo DFG-in p38, apo DFG-out p38, DFG-in:PUA association, and DFG-out:SK8 association simulations.
